# Supplementary material for: A quantitative homogeneous assay for fragile X mental retardation 1 protein
Source: PubMed Central journal article supplement (PMC3635944; doi:10.1186/1866-1955-5-8), 2013-04-02
Supplement: 1866-1955-5-8-S2.pdf [file 1866-1955-5-8-S2.pdf]

## Supplementary Figure 2

### A

ID: Mab2160

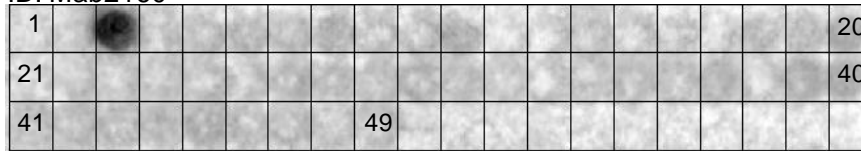

### B

| Peptide ID | Starting aminoacid | Peptide sequence               | Peptide ID | Starting aminoacid | Peptide sequence     | Peptide ID | Starting aminoacid | Peptide sequence      |
|------------|--------------------|--------------------------------|------------|--------------------|----------------------|------------|--------------------|-----------------------|
| 1          | 1                  | MEELVVEVRGSDNGAFYKAFV          | 21         | 261                | TFHIYGEDQDAVKKARSFLE | 41         | 521                | ERESFLRRGDGRRRGGGGGRG |
| 2          | 14                 | AFYKAFVKDVHEDSITVAFE           | 22         | 274                | KARSFLEFAEDVIQVPRNLV | 42         | 534                | RGGGGRGQGGRGRGGGFKGN  |
| 3          | 27                 | SITVAFEN <b>NNWQPD</b> RQIPFHD | 23         | 287                | QVPRNLVGKVIKNGKLIQE  | 43         | 547                | GGGFKGNDHSRDTNRPNP    |
| 4          | 40                 | RQIPFHDVRFPPPVGYNKDI           | 24         | 300                | NGKLIQEIVDKSGVVRVRIE | 44         | 560                | DNRPRNPREAKGRITDGSLSQ |
| 5          | 53                 | VGYNKDINESDEVEVYSRAN           | 25         | 313                | VVRVRIEAENEKNVPQEEI  | 45         | 573                | TTDGSLSQIRVDCNNERSVHT |
| 6          | 66                 | EVYSRANEKEPCCWWLAKVR           | 26         | 326                | VPQEEIEMPPNSLPSNNSRV | 46         | 586                | NERSVHTKTLQNTSSEGSRL  |
| 7          | 79                 | WWLAKVRMIKGEFYVIEYAA           | 27         | 339                | PSNNSRVGNAPAEKKHLDI  | 47         | 599                | SSEGSRLRTGKDRNQKKEKP  |
| 8          | 92                 | YVIEYAACDATYNEIVTIER           | 28         | 352                | EKKHLDIKENSTHFSQPNST | 48         | 612                | NQKKEKPSVDGGQQPLVNGV  |
| 9          | 105                | EIVTIERLRSVNPKNPATKD           | 29         | 365                | FSQPNSTKVQRVLVASSVVA | 49         | 625                | QPLVNGVPSVDGGQQPLVNGV |
| 10         | 118                | NKPATKDTFHKIKLDVPEDL           | 30         | 378                | VASSVVAGESQKPELKAQQG |            |                    |                       |
| 11         | 131                | LDVPEDLRQMCAKEAAHKDF           | 31         | 391                | ELKAWQGMVPFVFGTKDSI  |            |                    |                       |
| 12         | 144                | EAAHKDFKKAVGAFSVTYDP           | 32         | 404                | VGTKDSIANATVLLDYHLNY |            |                    |                       |
| 13         | 157                | FSVTYDPENYQLVILSINEV           | 33         | 417                | LDYHLNYLKEVDQLRLRLQ  |            |                    |                       |
| 14         | 170                | ILSINEVTSKRAHMLIDMHF           | 34         | 430                | LRRLRLQIDEQLRQIGASSR |            |                    |                       |
| 15         | 183                | MLIDMHFRSLRTKLSLIMRN           | 35         | 443                | QIGASSRPPPNRTDKEKSYV |            |                    |                       |
| 16         | 196                | LSLIMRNEEASKQLESSRQL           | 36         | 456                | DKEKSYVTDDGQGMGRGSRP |            |                    |                       |
| 17         | 209                | LESSRQLASRFHEQFIVRED           | 37         | 469                | MGRGSRPYRNRGHGRRGPGY |            |                    |                       |
| 18         | 222                | QFIVREDLMGLAIGTHGANI           | 38         | 482                | GRRGPGYTSQTNSEASNASE |            |                    |                       |
| 19         | 235                | GTHGANIQQARKVPGVTAID           | 39         | 495                | EASNASETSDHRDELSDWS  |            |                    |                       |
| 20         | 248                | PGVTAIDLDEDTCTFHIYGE           | 40         | 508                | DELSDWSLAPTEERESFLR  |            |                    |                       |

## Supplementary Figure 2: Mapping of the N-terminal Mab2160 epitope

A) A peptide blot covering the whole human FMRP sequence in 20 amino acid long peptides with a 7 amino acid overlap was subjected to Mab2160 incubation with subsequent immunoblot detection. B) Mab2160 epitope was identified as amino acids 34-39 (NNWQPD).
